# Supplementary material for: Correction: JMJD2C promotes colorectal cancer metastasis via regulating histone methylation of MALAT1 promoter and enhancing β-catenin signaling pathway
Source: PubMed Central journal article supplement (PMC9205033; doi:10.1186/s13046-022-02407-0), 2022-06-17

**A**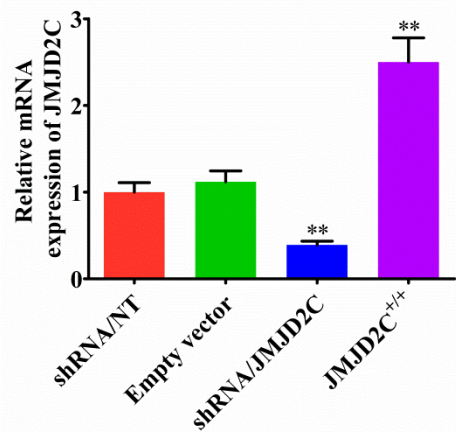**B**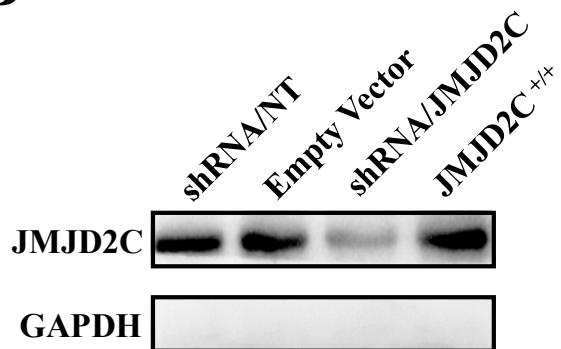**C**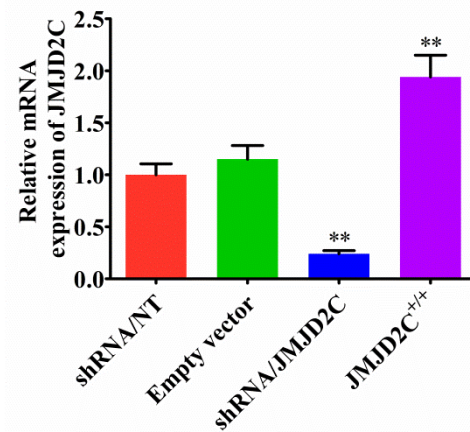**D**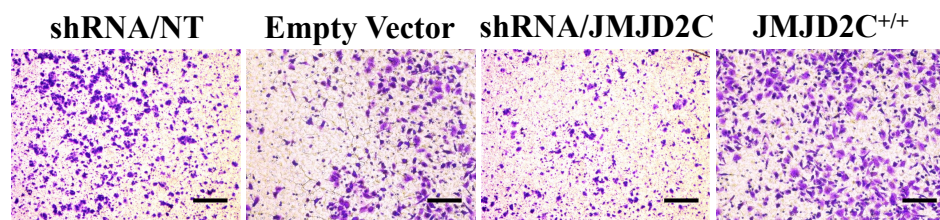**E**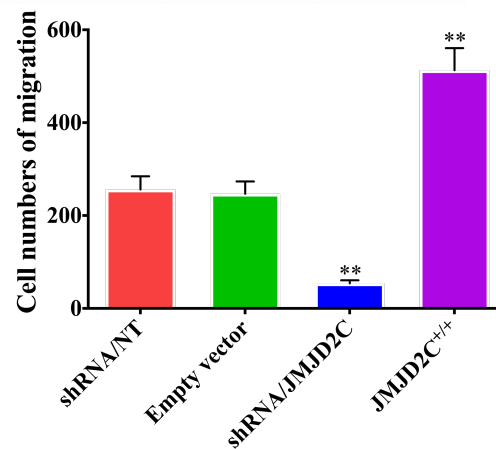

Supplement: 13046_2022_2407_MOESM1_ESM.pdf [file 13046_2022_2407_MOESM1_ESM.pdf]
